# Supplementary material
Source: PubMed Central journal article supplement (PMC2752832)

**Supplementary Fig. 1. New putative regulatory elements within the 5' flanking region of the PAI-1 gene.** (A) The seventeen Alu elements, containing putative c-jun/ATF binding sites, have been identified using the software available on the Internet. The sequences of binding sites are bolded and underlined; the location of the binding sites (relatively to the transcription start site) is indicated. (B) Alu element were cloned in front of the 115 bp long PAI-1 promoter, whereas the putative c-jun/ATF elements were cloned in the front of the *tk* minimal promoter. A172 cells were nucleofected with the indicated reporter constructs, stimulated with EGF, and analyzed as described in the legend Fig. 2C. (Insert) Binding to the putative c-jun/ATF element was analyzed by EMSA as described in the legend to Fig. 2B.

# Supplementary Figure 1

**A**

| SINE  | LOCATION         | STRAND | SEQUENCE                                      |
|-------|------------------|--------|-----------------------------------------------|
| AluSx | -14,091 - 14,057 | -      | GTCTCAAACCTCC <u>TGCGCTCA</u> ACTGATCTGCCTGC  |
| AluSx | -13,586 - 13,619 | -      | CTCTTGAACCTCC <u>TGACCTCA</u> AGGTGATCCACCTGC |
| AluSx | -13,260 - 13,294 | -      | GTCTCGAACTCT <u>TGACCTCA</u> AGTGTATCCACCTGC  |
| AluSx | -11,977 - 11,943 | +      | GTCTTGAACCTCC <u>TGCGCTCA</u> GGAGATCCACCTGC  |
| AluSx | -11,114 - 11,080 | +      | GTCTCGAACTCC <u>TGACCTCA</u> TGTAGTCCGCCCAT   |
| AluSc | -10,810 - 10,778 | +      | GTCTCCGTCTCC <u>TGACCTCA</u> TGATCT--GCCCGC   |
| AluSx | -10,234 - 10,268 | -      | GTCTCGAACTCC <u>TGATCTCA</u> AGTGTATCTGCCCGC  |
| AluSg | -9,007 - 8,975   | +      | GTCTTGAACCTCC <u>TGACCTC</u> GTG--ATCCGCCCGC  |
| AluJo | -8,187 - 8,153   | +      | GTCTCGAACTCC <u>TGCGCTCA</u> AGCAATCCTGCCAC   |
| AluSx | -7,671 - 7,705   | -      | GTCTCAAACCTCC <u>TGAGCTCA</u> ACTGATCTTCCAC   |
| AluJb | -6,456 - 6,490   | -      | TTCTTGAACCTCC <u>TGAGCTCA</u> AGTGACCGACCTGC  |
| AluSq | -6,130 - 6,164   | -      | GTCTTGAACCTCC <u>TGACCTCA</u> AGTGTATCCGCCCTC |
| AluSg | -5,435 - 5,457   | -      | GTCTCGATCTCC <u>TGACCTCA</u> TG--ATCCACCAC    |
| AluJo | -3,598 - 3,564   | +      | GCCTTGAGCTCC <u>TAGGCTCA</u> AGCGATCCTCCTAC   |
| AluSx | -2,835 - 2,801   | +      | GTCTTGAACCTCC <u>TGCGCTCA</u> AGTGTATCCACCTGC |
| AluJo | -2,530 - 2,556   | -      | GACTTGAACCTCC <u>TGCGCTCA</u> AG----CAAG----  |
| AluSg | -1,837 - 1,869   | -      | GTCTCGAACTCC <u>TGACTC</u> GTG--ATCCGGCTGC    |

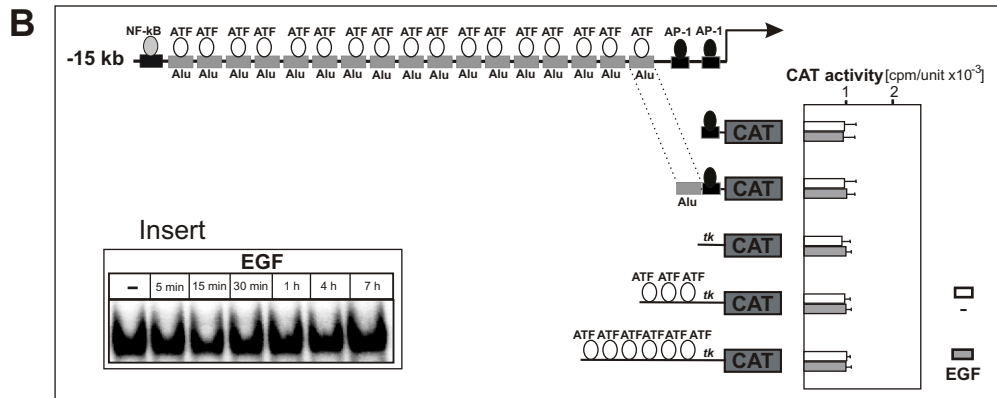

Supplement: NIHMS108452-supplement-supplemental_data.pdf [file NIHMS108452-supplement-supplemental_data.pdf]
